# Supplementary material for: Magnetic-field-induced energy bandgap reduction of perovskite KMnF3
Source: Royal Society of Chemistry journal article supplement (doi:10.1039/d0tc00088d), 2020-01-01
Supplement: d0tc00088d1.pdf [file d0tc00088d1.pdf]

Electronic supporting information for paper

## Magnetic-field-induced energy bandgap reduction of a perovskite by spin-orbit coupling via a low strength magnet

Ryan Taoran Wang<sup>a</sup>, Alex Fan Xu<sup>a</sup>, Lory Wenjuan Yang<sup>a</sup>, Jason Yuanzhe Chen<sup>a</sup>, Adrian Kitai<sup>a</sup>, Gu Xu<sup>a\*</sup>

<sup>a</sup> Department of Materials Science and Engineering, McMaster University, 1280 Main St W, Hamilton, ON, Canada, L8S 4L8

\*E-mail: xugu@mcmaster.ca

Phone: +1 905-525-9140 ext. 27341

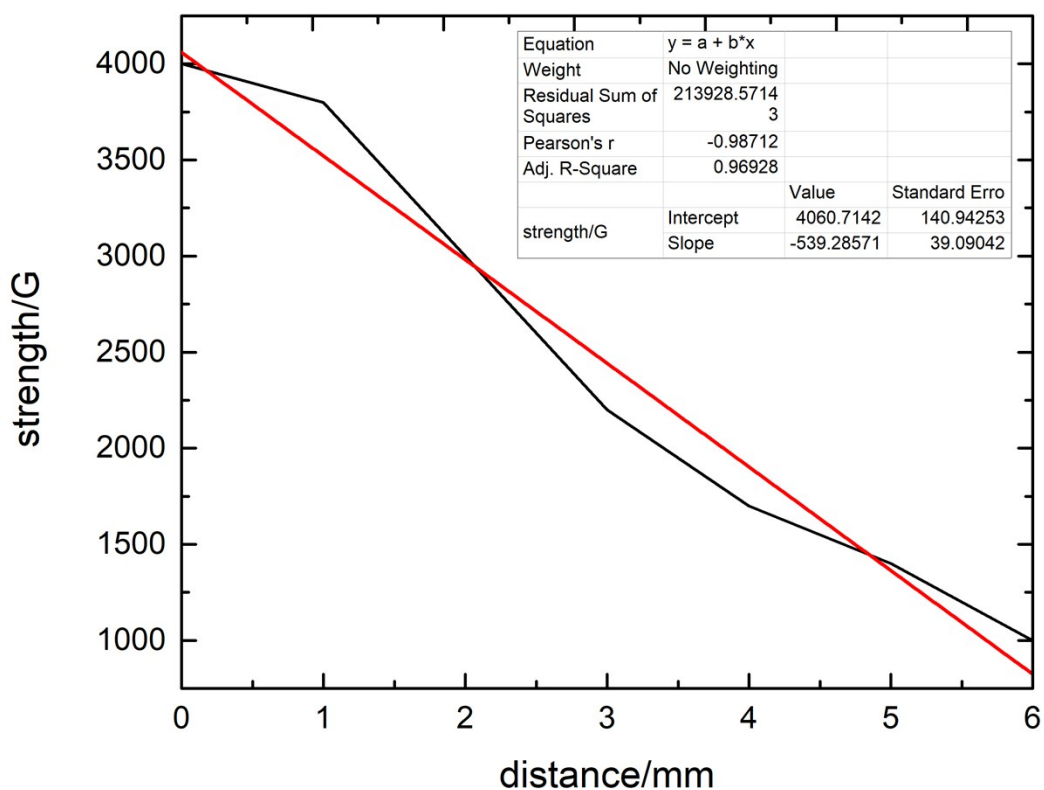

Figure S1. Curve of magnetic strength vs distance from the magnet cube surface and its linear fit

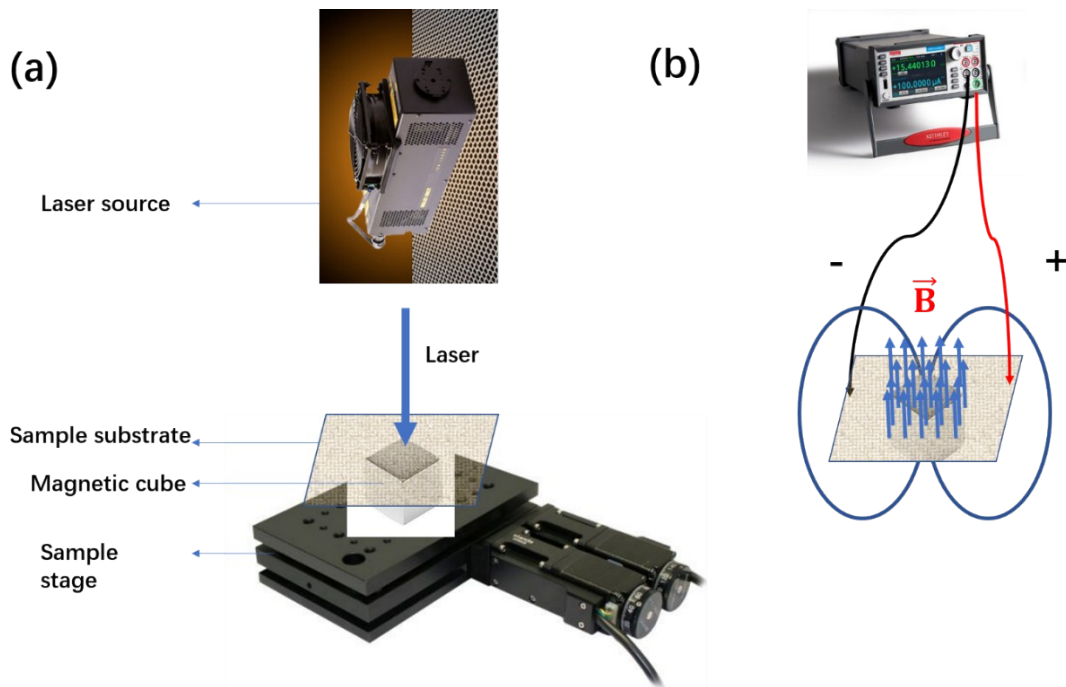

Figure S2. Schematic illustration of (a) the PL measurement with an external magnetic field, and (b) the conductivity measurement.

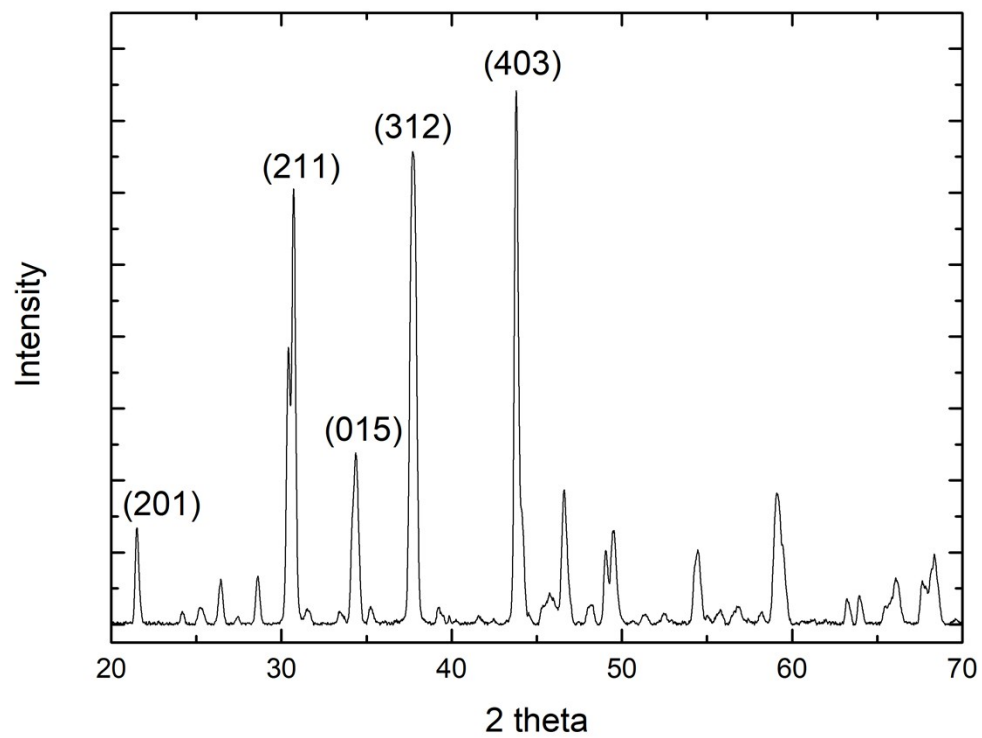

Figure S3. XRD diffraction pattern of CsPbBr<sub>3</sub> for the confirmation of the material

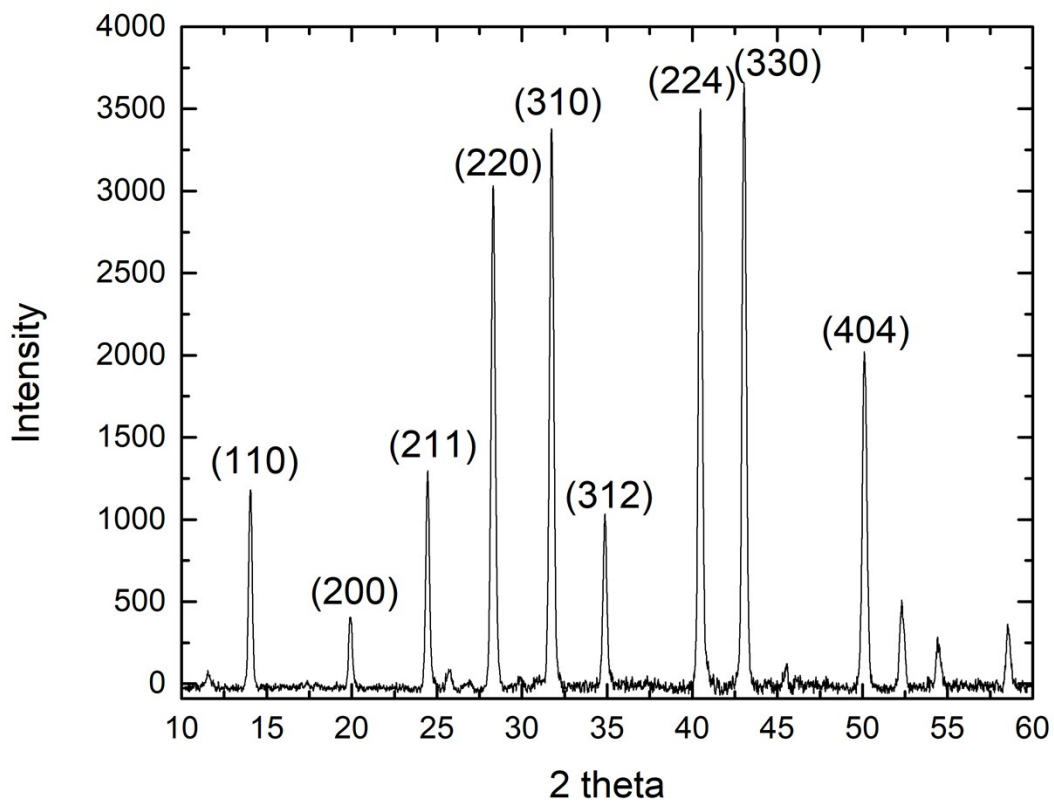

Figure S4. XRD diffraction pattern of MAPbI<sub>3</sub> for the confirmation of the material

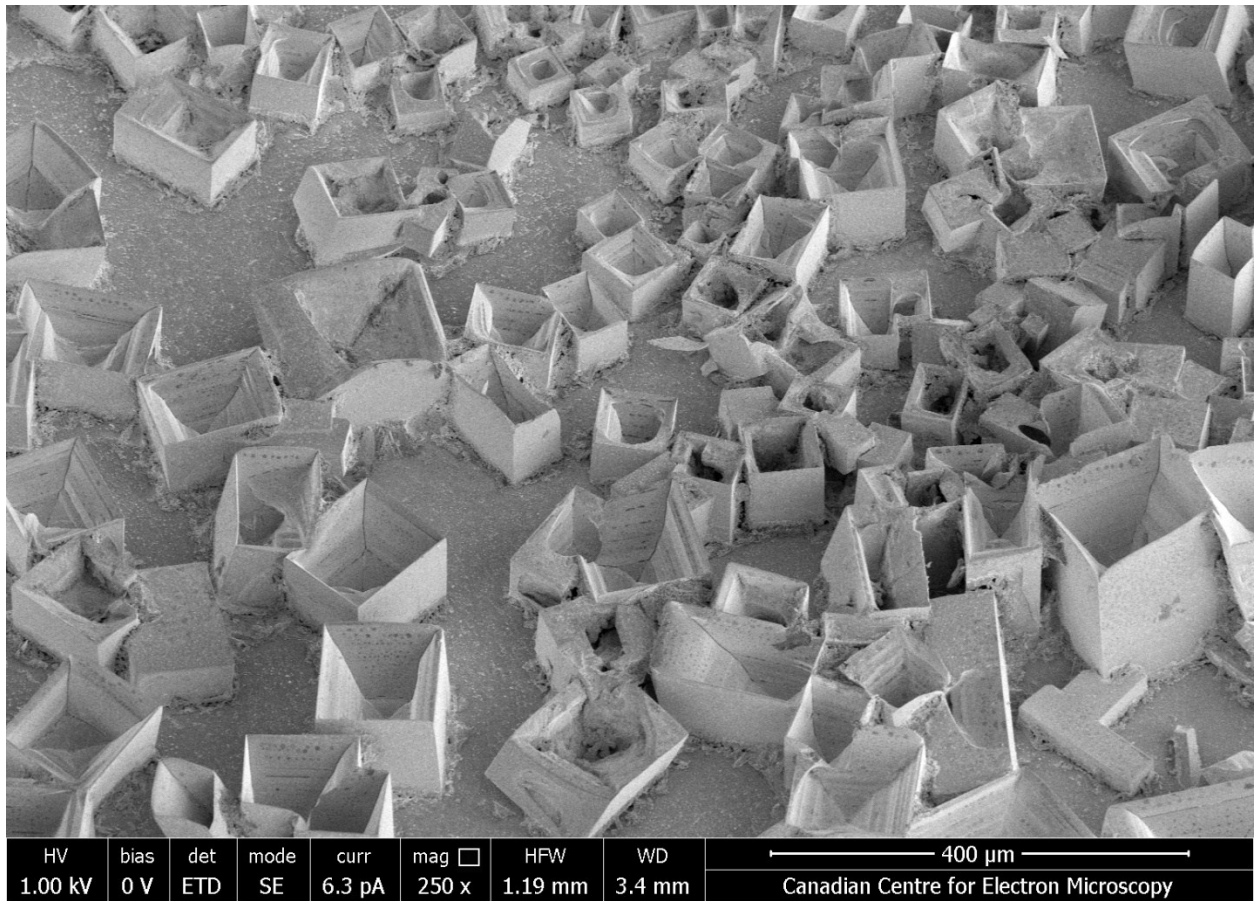

Figure S5. Super large grains of CsPbBr<sub>3</sub>.

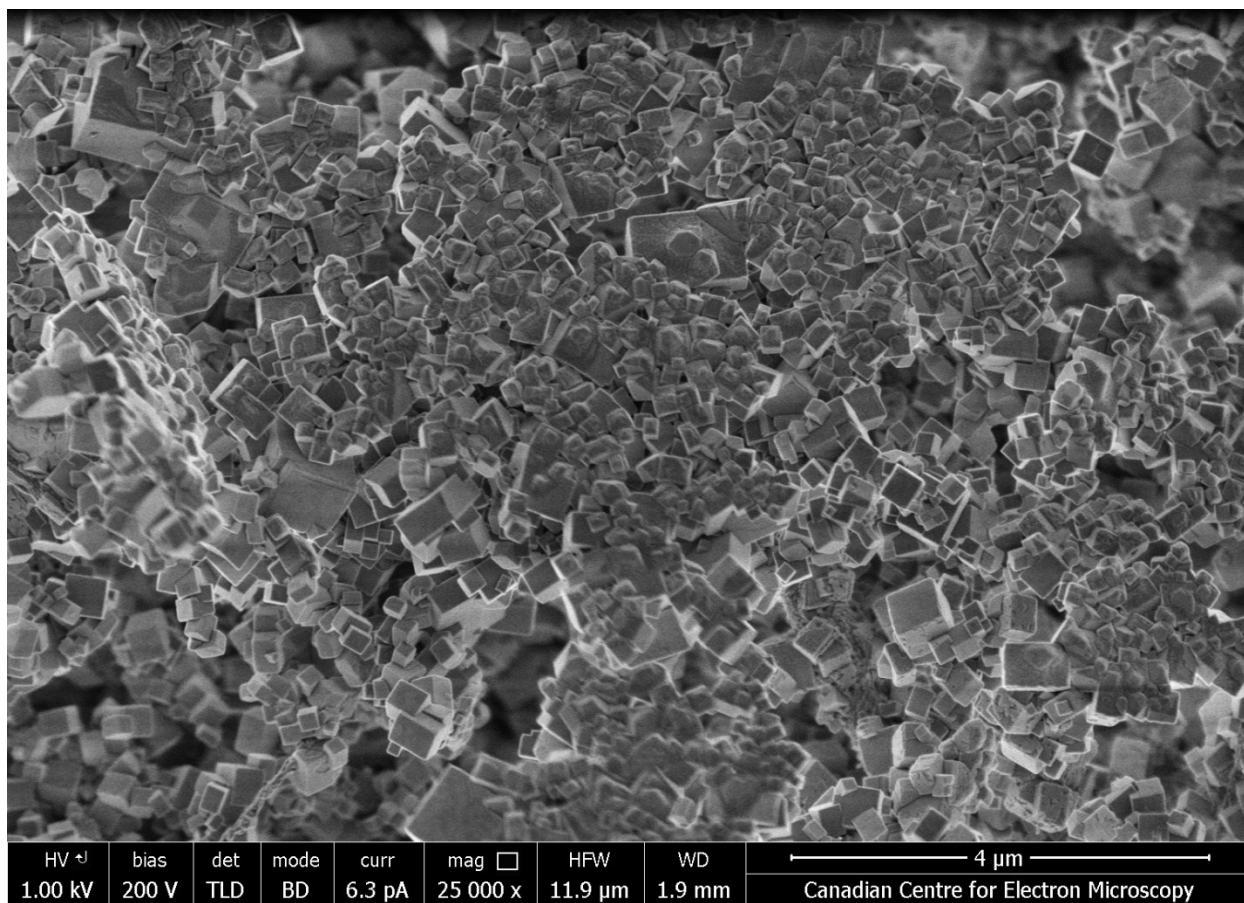

Figure S6. Clustered KZnF<sub>3</sub> cubes under SEM

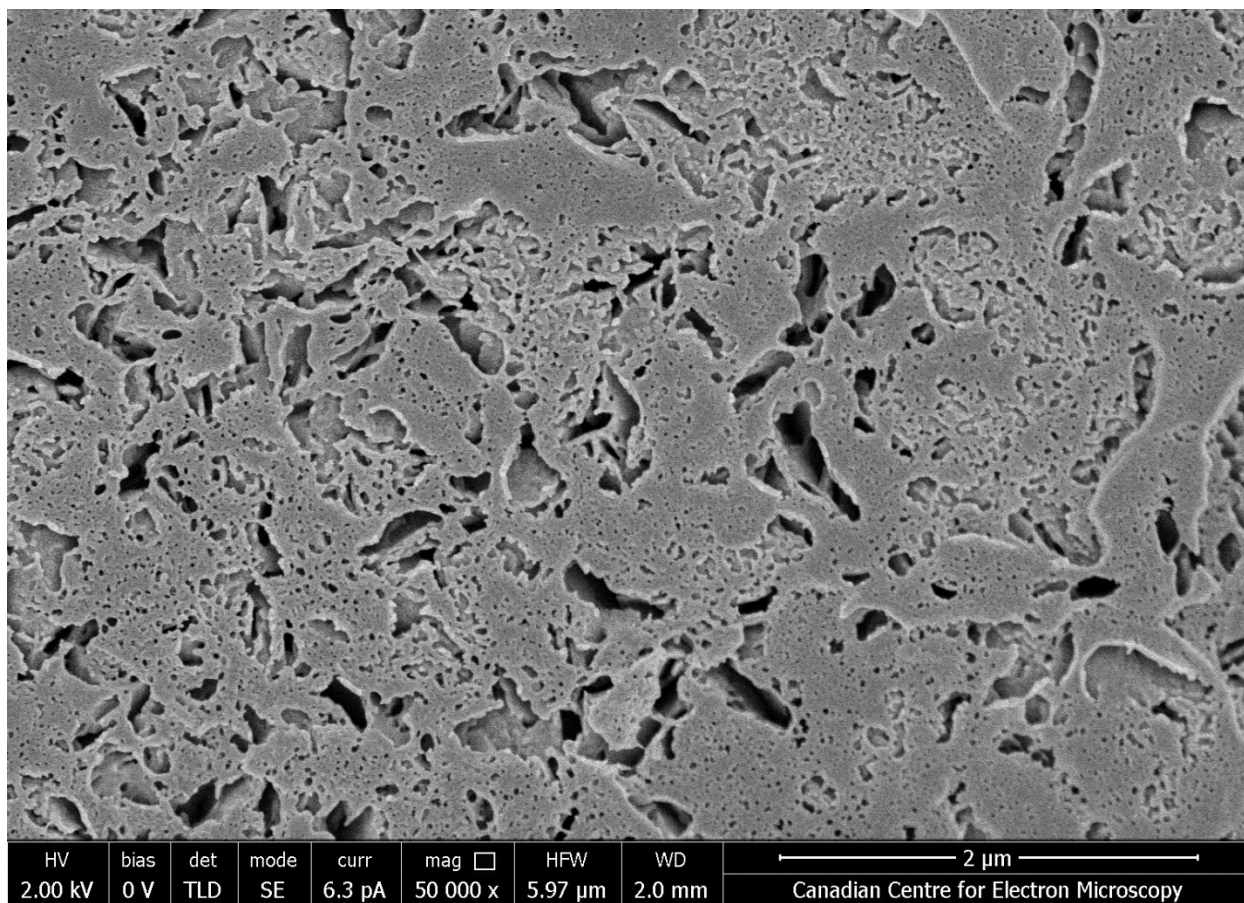

Figure S7. Morphology of MAPbI<sub>3</sub>.

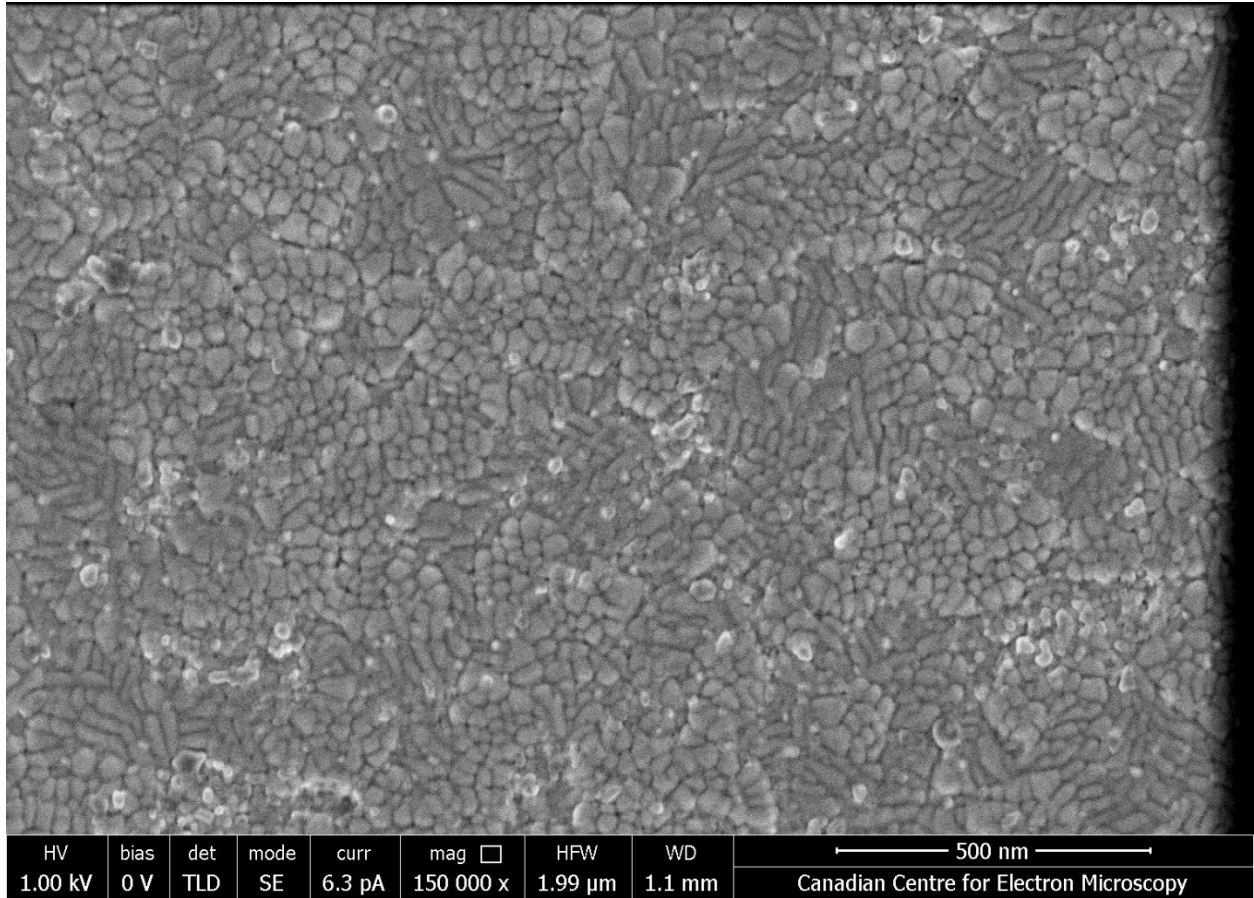

Figure S8. Nanosized grain of  $\text{KMnF}_3$  film deposited by sputtering
